# Supplementary material for: The potential use of digital health technologies in the African context: a systematic review of evidence from Ethiopia
Source: PubMed Central journal article supplement (PMC8371011; doi:10.1038/s41746-021-00487-4), 2021-08-17
Supplement: 41746_2021_487_MOESM1_ESM.pdf [file 41746_2021_487_MOESM1_ESM.pdf]

## Supplementary information

### The potential use of digital health technologies in the African context: A systematic review of the evidence from Ethiopia

#### Supplementary Note 1: Search strategy

##### 1. PubMed

| S. No | Query                                                                                                                                                                                                                                                                                                                                                                                                                                                                                                                                                                                                                                                                                                                                                         | Items found |
|-------|---------------------------------------------------------------------------------------------------------------------------------------------------------------------------------------------------------------------------------------------------------------------------------------------------------------------------------------------------------------------------------------------------------------------------------------------------------------------------------------------------------------------------------------------------------------------------------------------------------------------------------------------------------------------------------------------------------------------------------------------------------------|-------------|
| 1     | Digital health[MeSH Terms]                                                                                                                                                                                                                                                                                                                                                                                                                                                                                                                                                                                                                                                                                                                                    | 1,369       |
| 2     | Digital[Title/Abstract] OR Mobile[Title/Abstract] OR Smartphone[Title/Abstract] OR "Cell phone"[Title/Abstract] OR Techno*[Title/Abstract] OR "short message service"[Title/Abstract] OR SMS[Title/Abstract] OR Tele*[Title/Abstract] OR Telemedicine[Title/Abstract] OR Telehealth[Title/Abstract] OR E-health[Title/Abstract] OR eHealth[Title/Abstract] OR Remote[Title/Abstract] OR Electro*[Title/Abstract] OR Comput*[Title/Abstract] OR cloud[Title/Abstract] OR Software[Title/Abstract] OR Application[Title/Abstract] OR Robotics[Title/Abstract] OR Blockchain[Title/Abstract] OR "Artificial intelligence"[Title/Abstract] OR genomics[Title/Abstract] OR "big data"[Title/Abstract] OR cybersecurity[Title/Abstract] OR wireless[Title/Abstract] | 4,277,229   |
| 3     | 1 OR 2<br>(Digital health[MeSH Terms]) OR (Digital[Title/Abstract] OR Mobile[Title/Abstract] OR Smartphone[Title/Abstract] OR "Cell phone"[Title/Abstract] OR Techno*[Title/Abstract] OR "short message service"[Title/Abstract] OR SMS[Title/Abstract] OR Tele*[Title/Abstract] OR Telemedicine[Title/Abstract] OR Telehealth[Title/Abstract] OR E-health[Title/Abstract] OR eHealth[Title/Abstract] OR Remote[Title/Abstract] OR Electro*[Title/Abstract] OR Comput*[Title/Abstract] OR cloud[Title/Abstract] OR Software[Title/Abstract] OR Application[Title/Abstract] OR Robotics[Title/Abstract] OR Blockchain[Title/Abstract] OR "Artificial intelligence"[Title/Abstract] OR                                                                          | 4,277,413   |

|   |                                                                                                                                                                                                                                                                                                                                                                                                                                                                                                                                                                                                                                                                                                                                                                                                                                             |        |
|---|---------------------------------------------------------------------------------------------------------------------------------------------------------------------------------------------------------------------------------------------------------------------------------------------------------------------------------------------------------------------------------------------------------------------------------------------------------------------------------------------------------------------------------------------------------------------------------------------------------------------------------------------------------------------------------------------------------------------------------------------------------------------------------------------------------------------------------------------|--------|
|   | genomics[Title/Abstract] OR "big data"[Title/Abstract] OR cybersecurity[Title/Abstract] OR wireless[Title/Abstract])                                                                                                                                                                                                                                                                                                                                                                                                                                                                                                                                                                                                                                                                                                                        |        |
| 4 | Ethiopia[Title/Abstract]                                                                                                                                                                                                                                                                                                                                                                                                                                                                                                                                                                                                                                                                                                                                                                                                                    | 17,578 |
| 5 | 3 AND 4<br>((Digital health[MeSH Terms]) OR (Digital[Title/Abstract] OR Mobile[Title/Abstract] OR Smartphone[Title/Abstract] OR "Cell phone"[Title/Abstract] OR Techno*[Title/Abstract] OR "short message service"[Title/Abstract] OR SMS[Title/Abstract] OR Tele*[Title/Abstract] OR Telemedicine[Title/Abstract] OR Telehealth[Title/Abstract] OR E-health[Title/Abstract] OR eHealth[Title/Abstract] OR Remote[Title/Abstract] OR Electro*[Title/Abstract] OR Comput*[Title/Abstract] OR cloud[Title/Abstract] OR Software[Title/Abstract] OR Application[Title/Abstract] OR Robotics[Title/Abstract] OR Blockchain[Title/Abstract] OR "Artificial intelligence"[Title/Abstract] OR genomics[Title/Abstract] OR "big data"[Title/Abstract] OR cybersecurity[Title/Abstract] OR wireless[Title/Abstract])) AND (Ethiopia[Title/Abstract]) | 2,819  |

## 2. ScienceDirect

| S. No | Query                                                                                                                                                                                                                                                                                                                                                  | Items found |
|-------|--------------------------------------------------------------------------------------------------------------------------------------------------------------------------------------------------------------------------------------------------------------------------------------------------------------------------------------------------------|-------------|
| 1     | Digital OR Mobile OR Smartphone OR "Cell phone" OR Techno OR "short message service" OR SMS OR Tele OR Telemedicine OR Telehealth OR E-health OR eHealth OR Remote OR Electro OR Comput OR cloud OR Software OR Application OR Robotics OR Blockchain OR "Artificial intelligence" OR genomics OR "big data" OR cybersecurity OR wireless AND Ethiopia | 277         |

### 3. African Journals Online (AJOL)

| S. No | Query                                                                                                                                                                                                                                                                                                                                                  | Items found |
|-------|--------------------------------------------------------------------------------------------------------------------------------------------------------------------------------------------------------------------------------------------------------------------------------------------------------------------------------------------------------|-------------|
| 1     | Digital OR Mobile OR Smartphone OR "Cell phone" OR Techno OR "short message service" OR SMS OR Tele OR Telemedicine OR Telehealth OR E-health OR eHealth OR Remote OR Electro OR Comput OR cloud OR Software OR Application OR Robotics OR Blockchain OR "Artificial intelligence" OR genomics OR "big data" OR cybersecurity OR wireless AND Ethiopia | 20,400      |

#### 4. ClinicalTrials.gov

| S. No | Query                                                                                                                                                                                                                                                                                                                                                  | Items found |
|-------|--------------------------------------------------------------------------------------------------------------------------------------------------------------------------------------------------------------------------------------------------------------------------------------------------------------------------------------------------------|-------------|
| 1     | Digital OR Mobile OR Smartphone OR "Cell phone" OR Techno OR "short message service" OR SMS OR Tele OR Telemedicine OR Telehealth OR E-health OR eHealth OR Remote OR Electro OR Comput OR cloud OR Software OR Application OR Robotics OR Blockchain OR "Artificial intelligence" OR genomics OR "big data" OR cybersecurity OR wireless AND Ethiopia | 20          |

## 5. WHO International Clinical Trials Registry Platform (ICTRP)

| S. No | Query                                                                                                                                                                                                                                                                                                                                                  | Items found |
|-------|--------------------------------------------------------------------------------------------------------------------------------------------------------------------------------------------------------------------------------------------------------------------------------------------------------------------------------------------------------|-------------|
| 1     | Digital OR Mobile OR Smartphone OR "Cell phone" OR Techno OR "short message service" OR SMS OR Tele OR Telemedicine OR Telehealth OR E-health OR eHealth OR Remote OR Electro OR Comput OR cloud OR Software OR Application OR Robotics OR Blockchain OR "Artificial intelligence" OR genomics OR "big data" OR cybersecurity OR wireless AND Ethiopia | 355         |

## 6. Embase

| S. No | Query                                                                                                                                                                                                                                                                                                                                                  | Items found |
|-------|--------------------------------------------------------------------------------------------------------------------------------------------------------------------------------------------------------------------------------------------------------------------------------------------------------------------------------------------------------|-------------|
| 1     | Digital OR Mobile OR Smartphone OR "Cell phone" OR Techno OR "short message service" OR SMS OR Tele OR Telemedicine OR Telehealth OR E-health OR eHealth OR Remote OR Electro OR Comput OR cloud OR Software OR Application OR Robotics OR Blockchain OR "Artificial intelligence" OR genomics OR "big data" OR cybersecurity OR wireless AND Ethiopia | 3,578       |

## 7. Cochrane Central Registry of Controlled Trials

| S. No | Query                                                                                                                                                                                                                                                                                                                                                  | Items found |
|-------|--------------------------------------------------------------------------------------------------------------------------------------------------------------------------------------------------------------------------------------------------------------------------------------------------------------------------------------------------------|-------------|
| 1     | Digital OR Mobile OR Smartphone OR "Cell phone" OR Techno OR "short message service" OR SMS OR Tele OR Telemedicine OR Telehealth OR E-health OR eHealth OR Remote OR Electro OR Comput OR cloud OR Software OR Application OR Robotics OR Blockchain OR "Artificial intelligence" OR genomics OR "big data" OR cybersecurity OR wireless AND Ethiopia | 18          |
